## Detection and antibiotic susceptibility of pathogenic *Escherichia coli* isolated from the final effluent of two wastewater treatment Plants in the Eastern Cape Province, South Africa

Authors: - \*Osuolale Olayinka and Okoh Anthony

<sup>1</sup> Applied Environmental Metagenomics and Infectious Disease Research, Elizade University, Ilara-Mokin, Nigeria; olayinka.osuolale@elizadeuniversity.edu.ng

<sup>2</sup> Applied and Environmental Microbiology Research Group, Department of Biochemistry and Microbiology, University of Fort Hare, Alice 5700, South Africa; aokoh@ufh.ac.za

\* Correspondence: olayinka.osuolale@elizadeuniversity.edu.ng; Tel.: +2348032277655

### Abstract

Wastewater is an important reservoir for *Escherichia coli* and can present significant acute toxicity if released into receiving water sources without being adequately treated. To analyze whether pathogenic *E. coli* strains that cause infections are in treated effluent and to recognize antibiotic profile. 476 confirmed isolates from two treatment Plants were characterized for the presence of various *E. coli* pathotypes. A total of 8 pathotypes were screened and only four were confirmed. UPEC was about 5.7% followed by EAEC at 2.3%, NMEC at 1.1% and EPEC at 0.6%. Antibiotic susceptibility patterns of *E. coli* pathotypes such as UPEC showed low resistance to antibiotics like meropenem (100%), cefotaxime (100%) and gentamicin (88.9%). The pathotype also showed high degrees of resistance to tetracycline (74.1%), ampicillin (74.1%) and cephalothin (66.7%). Other *E. coli* pathotypes, EAEC, NMEC and EPEC, showed high sensitivity (100%) to meropenem, gentamicin and cefotaxime, and varying degree of resistances to ampicillin, tetracycline and cephalothin. The results of this study reveal that the two Plants discharge effluents with pathogenic *E. coli* and are reservoir for the bacteria into receiving water sources. In summary, this finding raises the possibility that at least some pathogenic *E. coli* pathotypes are getting into the environment through WWTPs and represent potential route for enteropathogenic infection. In addition, certain pathotypes may have acquired resistance properties, becoming a potential cause of drug resistance infection. This study reveals inadequacy of the plants studied to produce effluents of acceptable quality.

Keywords: Antibiotics, UPEC, EAEC, EPEC, NMEC, wastewater, *E. coli*, South Africa

## Introduction

Wastewater treatment Plants are important for managing and treating polluted used water. The management of this wastewater is crucial to averting environmental pollution, which could endanger public health (West and Mangiameli, 2000). The conventional system of wastewater treatment reduces the quantity of enteric bacteria. However, poorly treated wastewater in any of the treatment processes could hinder the effectiveness of any disinfectant applied to deactivate these organisms (Anastasi *et al.*, 2012).

The incomplete removal of pathogens and antibiotic-resistant bacteria from wastewater has consequently introduced treated but contaminated wastewater effluents into natural water resources, escalating the risk of infection (Dolejska *et al.*, 2011). *E. coli* with virulence characteristics of uropathogenic strains was reported to survive the treatment processes of sewage treatment Plants (STPs) and also found to be present in environmental water receiving effluent discharges from STPs (Anastasi *et al.*, 2010, 2012).

Aquatic environments are natural reservoirs of antibiotic-resistant bacteria, and wastewater treatment Plants (WWTPs) are among the primary water reservoirs of these microorganisms. Antibiotic resistance genes in bacteria in water environments are a global concern and have increased dramatically in the recent years. Broad range of antibiotics resistance encoding genes from microorganisms have been found in wastewater effluents, surface water, river water, groundwater and drinking water (Dolejska *et al.*, 2011). Multi-drug resistance has been shown in *E. coli* (Shariff *et al.*, 2013).

To this extent, studies from several provinces in South Africa on wastewater effluents and water bodies have demonstrated the presence of pathogenic and antibiotic resistance *E. coli* (Omar and Barnard, 2010; Olaniran *et al.*, 2009; Phokela *et al.*, 2011).

The present study is a follow up study by (Osuolale and Okoh, 2015a, 2017, 2015b) undertaken to assess the quality of treated effluent discharged from wastewater treatment Plants in Eastern Cape, South Africa. This study was done as part of a wider study that included three other WWTPs, though those sites were used for viral sampling rather than bacterial sampling (Osuolale and Okoh, 2017) The discharge to water bodies was tested for pathogenic *E. coli* and their antibiotic profiles. The areas of study are unique in their semi-rural and semi-urban features. Our study hopes to provide insights into the presence of pathogenic *E. coli* in treated effluent.

## Materials and Methods

### Study area and sampling procedure

The Plant A wastewater treatment works is located at geographical location of longitude 33° 00' 59''S and latitude 27° 51' 48''E. The Plant is medium sized, with treatment capacity of 5ML/day. The Bio-filter/PETRO (pond-enhanced treatment and operation) process treatment system is employed for the treatment of influent (DWAF, 2009) and the final effluent is discharged into the Umzonyana stream. The Plant B WWTP is located at geographical coordinate of Long. 27°23'47'' S and Lat. 32°85'36'' E. The Plant receives municipal domestic sewage and run-off water. The wastewater treatment Plant is medium size and an activated sludge system with design capacity of about 8 ML/day (DWAF, 2009). The Plant treats an average dry weather flow of 7000 m<sup>3</sup>/day and an average wet weather flow of 21 000 m<sup>3</sup>/day. The final effluent is discharged into the Mdizeni stream, which is a tributary of the Keiskamma River.

Samples were collected on a monthly basis from the final treated effluent (FE) for a period of 12 months (September 2012 to August 2013). Samples were collected in sterile 1.7 litre Nalgene bottles. 10% sodium thiosulphate was added to sampling bottles to neutralize the chlorine effect on the target organisms. Samples were stored and transported in chiller boxes to the Applied and Environmental Microbiology Research Group (AEMREG) laboratory at the University of Fort Hare, Alice, South Africa for analysis. The collected samples were processed within six hours. The sampling frequency and number of samples are as recommended in the Quality of Domestic Water Supplies Volume 2: Sampling Guide (DWAF *et al.*, 2000).

Bacteriological analysis of the effluent samples for isolation was determined by membrane filtration according to (Sans, 2011). *E. coli* coliforms chromogenic Agar (Conda, Madrid) was used for the isolation of *E. coli*. It differentiates *E. coli* from the rest of the Enterobacteriaceae. *E. coli* is easily distinguishable due to the dark blue-greenish colony colour. The filters were placed on the agar and incubated at 37 °C for 24 hours. This was done in triplicate. The target colonies were counted and reported as CFU/100 ml. After 24 hrs incubation, counts in the suitable range (0-300 colonies) were recorded using manual counting and the results per dilution plate count were recorded.

### Genotypic identification of *E. coli*

#### Isolation of genomic DNA

Purified presumptive *E. coli* isolates were grown in Lubria broth (LB) overnight for crude DNA extraction. The ZR Fungal/Bacterial DNA MiniPrep by Zymo Research was used to extract genomic DNA following the manufacturer's instructions; genomic extract was immediately used in the molecular identification of the isolated organisms. Alternatively, prior to the PCR reaction, the DNA extract was stored at -20 °C.

## PCR

Primers specific for the confirmation of the *E. coli* isolates were used in the polymerase chain reaction. The primers specific for the *uidA* gene in *E. coli* previously developed and examined for specificity to faecal pollution were used in the molecular identification of the isolates. Molecular identification was done targeting the *uidA* gene using the forward (5'-AAAACGGCAAGAAAAAGCAG-3') and reverse (5'-ACGCGTGGTTAACAGTCTTGCG-3') primers with a 147 bp expected amplicon (Dungeni *et al.*, 2010). The reaction parameters were 94 °C for 2 min, 30 cycles of 94 °C for 1min, 62.7 °C for 90 min, and 72 °C for 1 min and a final extension at 72 °C for 5 min. The primers specific for pathotypes are shown in Table 1. PCR amplification was performed with a MyCycler thermal cycler PCR (BioRad). The PCR solution contained 2 × PCR mastermix, 100uM each of 1ul each of the forward and reverse primers. The total volume for the PCR reaction was 25µl, 5µl of template DNA from each bacterial strain was added to make the final 25µl reaction volume. Gel electrophoresis was performed on the PCR product and run on a 2% w/v agarose gel at 100 V for approximately 90 mins. The gel image was captured digitally and analyzed using the Uvitec, Alliance 4.7. The chromosomal DNA of the positive control was used as reference control for primer accuracy and specificity.

Table 1:-Primer pairs, expected amplicon size for characterization of *E. coli* pathotypes

| Target strains | Target genes | Primer sequence (5'→3')                                               | Amplicon size (bp) | References                   |
|----------------|--------------|-----------------------------------------------------------------------|--------------------|------------------------------|
| <b>EPEC</b>    | eae          | TCA ATG CAG TTC CGT TAT CAG TT<br>GTA AAG TCC GTT ACC CCA ACC<br>TG   | 482                | (Vidal <i>et al.</i> , 2005) |
| <b>ETEC</b>    | lt           | GCA CAC GGA GCT CCT CAG TC<br>TCC TTC ATC CTT TCA ATG GCT TT          | 218                |                              |
| <b>EIEC</b>    | ipaH         | CTC GGC ACG TTT TAA TAG TCT GG<br>GTG GAG AGC TGA AGT TTC TCT<br>GC   | 933                |                              |
| <b>EAEC</b>    | Eagg         | AGA CTC TGG CGA AAG ACT GTA<br>TCATG GCT GTC TGT AAT AGA TGA<br>GAA C | 194                | (Omar and Barnard, 2010)     |
| <b>DAEC</b>    | daaE         | GAA CGT TGG TTA ATG TGG GGT<br>AA<br>TAT TCA CCG GTC GGT TAT CAG T    | 542                | (Vidal <i>et al.</i> , 2005) |
| <b>UPEC</b>    | pap          | GACGGCTGTACTGCAGGGTGTGGCG<br>ATATCCTTTCTGCAGGGATGCAATA                | 328                | (Abe <i>et al.</i> , 2008)   |
| <b>NMEC</b>    | IbeA         | ibeA-F-<br>TTACCGCCGTTGATGTTATCA<br>ibeA-R-<br>CATTAGCTCTCGGTTACGCT   | 171                | (Watt and Lanotte, 2003)     |

## Antimicrobial susceptibility testing

Antimicrobial susceptibility testing was done using the standard disc diffusion method on Mueller-Hinton agar (MH) (Conda, Madrid) as recommended by the Clinical and Laboratory Standards Institute (CLSI, 2012b). Fresh colonies (about 18 hrs old) from nutrient agar culture plates were picked into test tubes containing 5 ml sterile normal saline. The turbidity of the suspension was adjusted to 0.5 McFarland standards. Sterile swabs with bacterial suspensions were used to inoculate the MH agar plates by spreading uniformly on the surface of the agar. Selection of antimicrobials are based on the type of organism being tested and source of the isolates (CLSI, 2012b). Also, the antibiotics were selected as representatives of different classes of antibacterial drugs, to better depict the behaviour of the examined strains against these molecules. The antimicrobial susceptibility test for *E. coli* isolates was determined using the following antibiotic discs: ampicillin (10 µg), cefotaxime (30 µg), gentamicin (10 µg), meropenem (10 µg), tetracycline (30 µg), and cephalothin (30 µg) (Davies Diagnostics, SA) (CLSI, 2012b).

## Results

At Plant A, a total of 406 presumptive *E. coli* were isolated and 437 isolates were collected from Plant B (Table 2). During the study period, a total of 476 *E. coli* isolates from both Plants together were confirmed (Figure 1). About 5.7% (27) of the confirmed *E. coli* isolates were UPEC. The Plant A WWTP accounted for 77.8% (21) of the total UPEC isolates and Plant B accounted for 22.2% (6) (Table 3). Figure 2 (below) shows the PCR confirmation of the pap gene for UPEC. EAEC was the next most detected, accounting for 2.3% (11) of the total confirmed *E. coli* isolates (Figure 3). Plant A accounts for 81.8% (9) of the total confirm EAEC isolates, with 18.2% (2) at Plant B. Other confirmed pathotypes are NMEC (Figure 4), which was only detected in Plant A, and EPEC was only detected at Plant B. The other *E. coli* pathotypes like ETEC, EIEC and Diffuse-adhering *E. coli* were not detected at either Plant. The results of the *E. coli* pathotyping are as shown in Table 3, below.

Table 2:-*E. coli* confirmation of the presumptive isolates

| Site         | Number of isolates | Number of positive isolates (PCR) |
|--------------|--------------------|-----------------------------------|
| Plant A      | 406                | 270                               |
| Plant B      | 437                | 206                               |
| <b>Total</b> | <b>943</b>         | <b>476</b>                        |

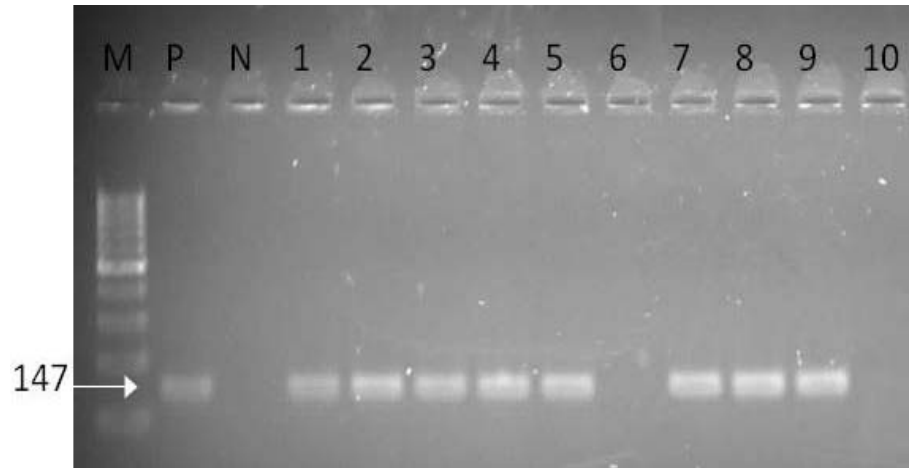

M: Molecular weight marker (100bp), P: *Escherichia coli* ATCC 8973 (Positive control), N: Negative control; Lanes 1-10: *E. coli* isolates

**Figure 1: Agarose gel electrophoresis of uidA gene amplification products of *E. coli***

Table 3:-Result of *E. coli* pathotyping

| Pathotypes                                           | Plant A (n = 270) | Plant B (n=206) |
|------------------------------------------------------|-------------------|-----------------|
| Enteropathogenic <i>E. coli</i> (EPEC)               | 0                 | 3               |
| Enterotoxigenic <i>E. coli</i> (ETEC)                | 0                 | 0               |
| Enteroinvasive <i>E. coli</i> (EIEC)                 | 0                 | 0               |
| Enteraggregative <i>E. coli</i> (EAEC)               | 9                 | 2               |
| Neonatal meningitis-associated <i>E. coli</i> (NMEC) | 5                 | 0               |
| Uropathogenic <i>E. coli</i> (UPEC)                  | 21                | 6               |
| Diffuse-adhering <i>Escherichia coli</i>             | 0                 | 0               |

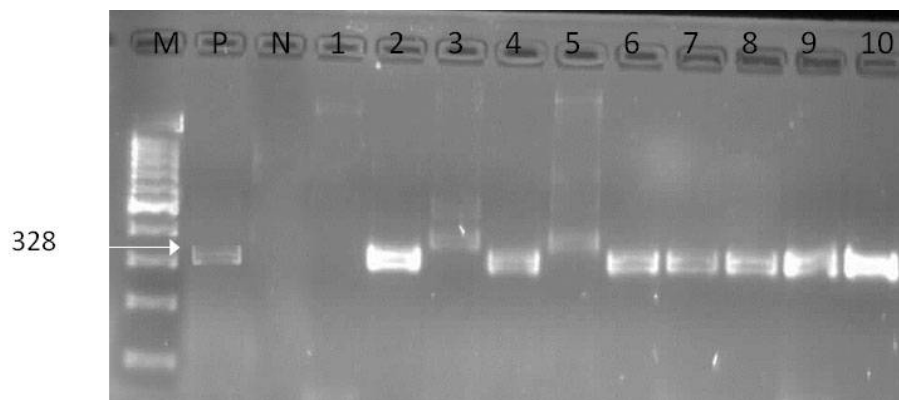

M: Molecular weight marker (100bp), P: *Escherichia coli* (UPEC) DSM 4618 (Positive control)  
N: Negative control; Lanes 1-10: *E. coli* isolates

**Figure 2: Agarose gel electrophoresis of pap gene amplification products of UPEC**

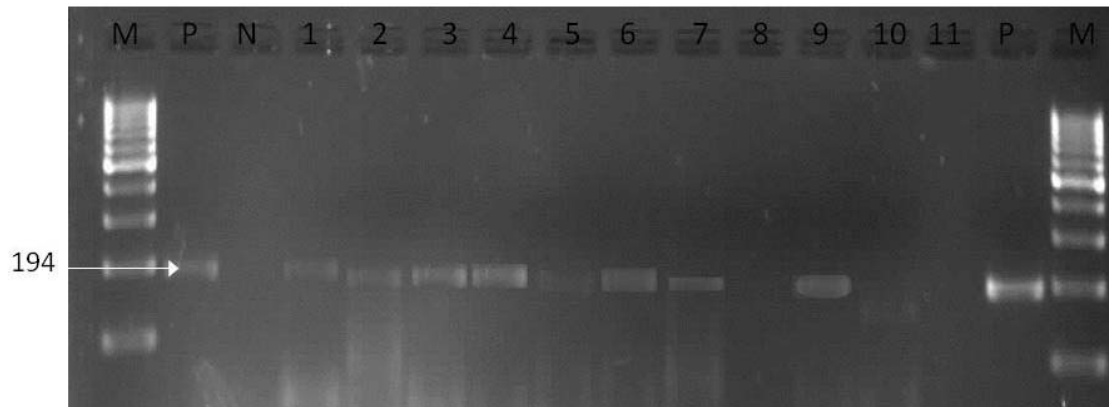

M: Molecular weight marker (100bp), P: *Escherichia coli* (EAEC) DSM 10974 (Positive control), N: Negative control; Lanes 1-11: *E. coli* isolates

**Figure 3: Agarose gel electrophoresis of EAEC gene amplification products of EAEC**

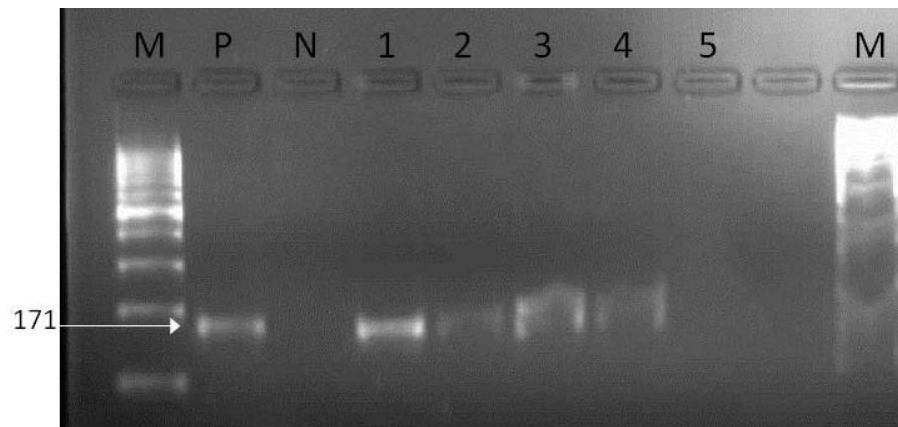

M: Molecular weight marker (100bp), P: *Escherichia coli* (NMEC) DSM 10819 (Positive control), N: Negative control; Lanes 1-5: *E. coli* isolates

**Figure 4: Agarose gel electrophoresis of ibe gene amplification products of NMEC**

### Antimicrobial susceptibility testing

The UPEC isolates showed low resistance to antibiotics like meropenem (100%), cefotaxime (100%) and gentamicin (88.9%). The isolates showed high degrees of resistance to tetracycline



(74.1%), ampicillin (74.1%) and cephalothin (66.7%). Other *E. coli* pathotypes, EAEC, NMEC and EPEC, showed high sensitivity (100%) to meropenem, gentamicin and cefotaxime. EAEC had 63.6% resistance to tetracycline and 54.5% resistance to both ampicillin and cephalothin. Intermediate sensitivity (80%) to cephalothin was recorded for NMEC, which also had 60% resistance to tetracycline and 40% resistance to ampicillin. EPEC had 100% resistance to both ampicillin and cephalothin and 66.7% resistance to tetracycline. Each of the tested pathotypes showed resistance to two or three antibiotics, mainly ampicillin, tetracycline and cephalothin.

**Table 4:- Antimicrobial susceptibility testing of *E. coli* pathotypes**

| Pathotypes | n = 46, Susceptibility profile (%) |   |   |            |     |     |            |   |   |            |      |      |              |   |      |             |      |      |
|------------|------------------------------------|---|---|------------|-----|-----|------------|---|---|------------|------|------|--------------|---|------|-------------|------|------|
|            | Meropenem                          |   |   | Gentamicin |     |     | Cefotaxime |   |   | Ampicillin |      |      | Tetracycline |   |      | Cephalothin |      |      |
|            | S                                  | I | R | S          | I   | R   | S          | I | R | S          | I    | R    | S            | I | R    | S           | I    | R    |
| UPEC       | 100                                | - | - | 88.9       | 7.4 | 3.7 | 100        | - | - | 14.1       | 11.1 | 74.1 | 25.9         | - | 74.1 | 3.7         | 29.6 | 66.7 |
| EAEC       | 100                                | - | - | 100        | -   | -   | 100        | - | - | 36.4       | -    | 63.6 | 36.4         | - | 63.6 | -           | 45.5 | 54.5 |
| NMEC       | 100                                | - | - | 100        | -   | -   | 100        | - | - | 60         | -    | 40   | 40           | - | 60   | 20          | 80   | -    |
| EPEC       | 100                                | - | - | 100        | -   | -   | 100        | - | - | -          | -    | 100  | 33.3         | - | 66.7 | -           | -    | 100  |

Note: - S (susceptibility), I (Intermediate), R (Resistance)

## Discussion

This study showed finding on the incidence of four pathogenic *E. coli* strains in the final effluent discharge into surface water. About eight pathogenic *E. coli* pathotypes were identified. Five of the pathotypes can cause invasive intestinal infections, watery diarrhoea and dysentery in humans and animals, while the remaining three cause extra-intestinal infections caused by extra-intestinal pathogenic *E. coli* (ExPEC) (Bekal *et al.*, 2003). Four out of eight pathotypes identified and tested in this study are shown in Table 3. Both invasive and extra-intestinal pathotypes were identified. A previous study by Osode (2010) identified two *E. coli* pathotypes at Plant B; EHEC and EAEC were identified while EIEC was confirmed from another treatment Plant. This was in contrast to the outcome of this study for Plant B, in which EPEC, UPEC and EAEC pathotypes were identified. However, the detection rate at Plant B was low as compared to the second Plant (Plant A) with the exception of EPEC, which was only detected in Plant B. The efficiency of the treatment Plant could be one of the reasons why little or no pathogenic *E. coli* were detected at Plant B. Alternatively, it could be that *E. coli* strains found in these sites did not carry any virulence genes. This is evidenced by the absence of *E. coli* pathotypes from the *E. coli* that were isolated and confirmed. A similar situation was reported by Masters *et al.* (2011). However, at the Plant A, the three pathotypes were identified and in higher concentrations than Plant B. The identified pathotypes (Table 3) are of great public health importance. Apart from the EAEC previously identified by Osode (2010) in WWTP effluent in the Eastern Cape that was also identified in this study, NMEC and UPEC make up the major findings at the Plant A. Of the 476 confirmed *E. coli* isolates tested, UPEC was about 5.7% followed by EAEC at 2.3%, NMEC at 1.1% and EPEC at 0.6%. In a similar study by Verma, Ramteke and Garg (2008) in India, they



reported a high incidence of UPEC in the treated final effluent as well as EPEC but at a lower concentration. Anastasi et al. (2012, 2010) demonstrated that some *E. coli* strains with uropathogenic properties survived treatment stages of sewage treatment plants and are released into the environment. The presence of EPEC in another study was found to be more common in city wastewater contrasted with slaughterhouse wastewater where the frequency of ExPEC was not influenced by the wastewater treatment process and the predominance of a characteristic EPEC was observed to be low in the final effluents (Diallo *et al.*, 2013). The occurrence of EAEC in water was reported by Masters *et al.*, (2011). They investigated the presence of the virulence genes attributed to EAEC. This strain was identified in conjunction with EPEC, pointing to a possible source of faecal contamination. Hamelin *et al.*, (2007) reported the presence of EAEC, EPEC, UPEC and NMEC in river water receiving urban municipal wastewater. Also Koba (2013), in a study of the water from two rivers in the Eastern Cape, identified the presence of ETEC, EIEC and EPEC in one of the studied rivers and EAEC in both of the rivers studied. One of the studied sites, Plant A, also demonstrated a large diversity of *E. coli* pathotypes and similar study done by Adefisoye and Okoh, 2016, exhibit closely related trends in the quantity and types of pathogenic *E. coli* detected. The presence of these pathogenic organism groups has additionally been seen in past investigations where these strains were related with both human and non-human extra-intestinal infections (Bekal *et al.*, 2003). Agricultural products and other aquaculture have been reported to have a high risk of diarrhoea as well as individuals who were in direct contact with wastewater had a higher vulnerability of acquiring disease than the individuals who were most certainly not (Trang *et al.*, 2007). In the Eastern Cape and Limpopo Provinces of South Africa, these pathogenic *E. coli* with the exception of NMEC and UPEC have been isolated from diarrhoea patients, with EAEC being the predominant cause of infection (Bisi-Johnson *et al.*, 2011; Samie *et al.*, 2007). Their presence in the environment calls for concern because of their public health consequences (Clements *et al.*, 2012)

For routine reporting and primary testing, the choices of antibiotic panels selected were based upon the recommendation of CLSI (CLSI, 2012b). The antibiotics used for this study were representatives of some different classes of antibiotic. Five classes of the antibiotics were tested and they were: ampicillin of the penicillin class, gentamicin of the aminoglycosides, tetracycline, meropenem of the carbapenems, cephalothin and cefotaxime of the first and third generation cephalosporins (CLSI, 2012b). Antibiotic profiles of the pathogenic pathotypes demonstrated the lower effectiveness of ampicillin, tetracycline, and cephalothin, which is a first-generation cephalosporin. These antibiotics constitute the major classes of antibiotic drugs commonly used in first-line treatment. Though our study never tested for other class members of tetracycline, susceptibility of organisms to doxycycline and minocycline can be considered based on their susceptibility to tetracycline. However, intermediate or resistant to tetracycline by some organisms may be susceptible to doxycycline, minocycline, or both (CLSI, 2012a). All the pathogenic isolates showed a higher level of resistance than susceptibility to tetracycline. On the average, the organisms showed 60% resistance.

The choice of cefotaxime for this study was to identify the presence of Extended-spectrum beta-lactamase (ESBL) (CLSI, 2012b) among the isolates and none were found, as demonstrated by the 100% susceptibility to the drug (Table 4). The advent of carbapenem-resistant *E. coli* has become a global concern (Nordmann *et al.*, 2012), being one of the last lines defense drug for treatment. Our study was able to show that none of the pathogenic *E. coli* are resistant to the carbapenem drug class (Meropenem, see Table 4). Nontongana *et al.*, 2014 were able to demonstrate resistance to some of these antibiotics in their study on river water in the Eastern Cape. In a study carried out in Durban on wastewater treatment plant, the *E. coli* isolates tested, the most resistance was to ampicillin, amoxicillin, doxycycline, and tetracycline (Pillay and Olaniran, 2016). Multiple resistance patterns reported by Kinge *et al.*, 2010 and Mulamattathil *et al.*, 2014 from wastewater, surface water and water treatment plants were similar to the resistance pattern observed for our study against ampicillin and tetracycline. Though our study didn't find any carbapenem-resistant enterobacteriaceae (CRE) especially for *E. coli* in South Africa, but there have been reported cases of other members of the enterobacteriaceae like *Klebsiella* resistant to carbapenem (Brink *et al.*, 2012). Recent reports have highlighted the need for institutions to stem the indiscriminate use of antibiotics in the country and provide restrictive measures which can curtail the looming danger of acquiring CRE in South Africa (Coetsee and Brink, 2011). The presence of antibiotics in surface water and wastewater have been identified and data collected by Matongo *et al.*, 2015 reported that while insufficiently treated wastewater contributes to surface water contamination, other human activities through improper use and disposal of pharmaceutical products and wastes also contribute appreciably to the pharmaceutical loading of rivers.

Knowledge of the resistance pattern of pathogenic bacterial strains in geographical areas of South Africa should be enough to get their drug management and policy in place to stem the rising cases of microbial resistances in the country. It will help in directing the proper and the prudent utilization of antibiotics. The formulation of an appropriate institutional and organizational antibiotics policy will go a long way in controlling these infections (Shariff *et al.*, 2013).

We have previously reported the operational status of these wastewater treatment plants often result in the discharge of inadequately treated effluent into receiving surface waters (Osuolale and Okoh, 2015b, 2015a, 2017). Time is racing for South Africa to address her water challenges. The world is calling for safe wastewater management and reuse, which formed the basis of the UN's World Water Day. The antibiotic stewardship is an advocacy for wise antibiotic management use. It is therefore important for the management system of the Department of Water Affairs to review their handling of wastewater and antibiotics wastes to minimize their environmental impacts, and public health concerns.

## References

- Abe CM, Salvador FA, Falsetti IN, Vieira MAM, Blanco J, Blanco JE, *et al.* (2008). Uropathogenic *Escherichia coli* (UPEC) strains may carry virulence properties of diarrhoeagenic *E. coli*. *FEMS Immunol Med Microbiol* **52**: 397–406.
- Adefisoye MA, Okoh AI. (2016). Identification and antimicrobial resistance prevalence of pathogenic *Escherichia coli* strains from treated wastewater effluents in Eastern Cape, South Africa. *Microbiologyopen* **5**: 143–151.
- Anastasi EM, Matthews B, Gundogdu A, Vollmerhausen TL, Ramos NL, Stratton H, *et al.* (2010). Prevalence and persistence of *Escherichia coli* strains with uropathogenic virulence characteristics in sewage treatment plants. *Appl Environ Microbiol* **76**: 5882–5886.
- Anastasi EM, Matthews B, Stratton HM, Katouli M. (2012). Pathogenic *Escherichia coli* found in sewage treatment plants and environmental waters. *Appl Environ Microbiol* **78**: 5536–41.
- Bekal S, Brousseau R, Masson L, Prefontaine G, Fairbrother J, Harel J. (2003). Rapid identification of *Escherichia coli* pathotypes by virulence gene detection with DNA microarrays. *J Clin Microbiol* **41**: 2113–2125.
- Bisi-Johnson MA, Obi CL, Vasaikar SD, Baba KA, Hattori T. (2011). Molecular basis of virulence in clinical isolates of *Escherichia coli* and *Salmonella* species from a tertiary hospital in the Eastern Cape, South Africa. *Gut Pathog* **3**: 9.
- Brink A, Coetzee J, Clay C, Corcoran C, van Greune J, Deetlefs JD, *et al.* (2012). The spread of carbapenem-resistant Enterobacteriaceae in South Africa: Risk factors for acquisition and prevention. *South African Med J* **102**: 599–601.
- Clements A, Young J, Constantinou N, Frankel G. (2012). Infection strategies of enteric pathogenic *E. coli*. *Gut Microbes* **3**: 0–16.
- CLSI. (2012a). Performance Standards for Antimicrobial Disk Susceptibility Tests; Approved Standard — Eleventh Edition.
- CLSI. (2012b). Performance Standards for Antimicrobial Susceptibility Testing; Twenty-Second Informational Supplement. Clinical and Laboratory Standards Institute.
- Coetzee J, Brink A. (2011). The emergence of carbapenem resistance in Enterobacteriaceae in South Africa. *South African J Infect Dis* **26**: 239–240.
- Diallo AA, Brugère H, Kérourédan M, Dupouy V, Toutain PL, Bousquet-Mélou A, *et al.* (2013). Persistence and prevalence of pathogenic and extended-spectrum beta-lactamase-producing *Escherichia coli* in municipal wastewater treatment plant receiving slaughterhouse wastewater. *Water Res* **47**: 4719–4729.
- Dolejska M, Frolkova P, Florek M, Jamborova I, Purgertova M, Kutilova I, *et al.* (2011). CTX-M-15-producing *Escherichia coli* clone B2-O25b-ST131 and *Klebsiella* spp. isolates in municipal wastewater treatment plant effluents. *J Antimicrob Chemother* **66**: 2784–90.
- Dungeni M, van Der Merwe RR, Momba MNB. (2010). Abundance of pathogenic bacteria and viral indicators in chlorinated effluents produced by four wastewater treatment plants in the Gauteng Province, South. *Water SA* **36**: 607–614.
- DWAF, DHE, WRC. (2000). Quality of Domestic Water Supplies Volume 2: Sampling Guide.

- Hamelin K, Bruant G, El-Shaarawi A, Hill S, Edge TA, Fairbrother J, *et al.* (2007). Occurrence of virulence and antimicrobial resistance genes in *Escherichia coli* isolates from different aquatic ecosystems within the St. Clair River and Detroit River areas. *Appl Environ Microbiol* **73**: 477–484.
- Kinge CNW, Ateba CN, Kawadza DT. (2010). Antibiotic resistance profiles of *Escherichia coli* isolated from different water sources in the mmabatho locality, North-West Province, South Africa. *S Afr J Sci* **106**: 44–49.
- Masters N, Wiegand A, Ahmed W, Katouli M. (2011). *Escherichia coli* virulence genes profile of surface waters as an indicator of water quality. *Water Res* **45**: 6321–6333.
- Matongo S, Birungi G, Moodley B, Ndungu P. (2015). Occurrence of selected pharmaceuticals in water and sediment of Umgeni River, KwaZulu-Natal, South Africa. *Environ Sci Pollut Res* **22**: 10298–10308.
- Mulamattathil SG, Bezuidenhout C, Mbewe M, Ateba CN. (2014). Isolation of Environmental Bacteria from Surface and Drinking Water in Mafikeng, South Africa, and Characterization Using Their Antibiotic Resistance Profiles. *J Pathog* **2014**: 1–11.
- Nontongana N, Sibanda T, Ngwenya E, Okoh A. (2014). Prevalence and Antibigram Profiling of *Escherichia coli* Pathotypes Isolated from the Kat River and the Fort Beaufort Abstraction Water. *Int J Environ Res Public Health* **11**: 8213–8227.
- Nordmann P, Dortet L, Poirel L. (2012). Carbapenem resistance in Enterobacteriaceae: Here is the storm! *Trends Mol Med* **18**: 263–272.
- Olaniran AO, Naicker K, Pillay B. (2009). Antibiotic resistance profiles of *Escherichia coli* isolates from river sources in Durban, South Africa. *World J Microbiol Biotechnol* **25**: 1743–1749.
- Omar K, Barnard T. (2010). The occurrence of pathogenic *Escherichia coli* in South African wastewater treatment plants as detected by multiplex PCR. *Water SA* **36**: 172–176.
- Osode A. (2010). Assessment of the prevalence of virulent *Escherichia coli* strains in the final effluents of wastewater treatment plants in the Eastern Cape province of South Africa. University of Fort Hare. <http://ufh.netd.ac.za/handle/10353/256> (Accessed June 6, 2014).
- Osuolale O, Okoh A. (2015a). Assessment of the physicochemical qualities and prevalence of *Escherichia coli* and vibrios in the final effluents of two wastewater treatment plants in South Africa: Ecological and public health implications. *Int J Environ Res Public Health* **12**: 13399–13412.
- Osuolale O, Okoh A. (2017). Human enteric bacteria and viruses in five wastewater treatment plants in the Eastern Cape, South Africa. *J Infect Public Health*. e-pub ahead of print, doi: 10.1016/j.jiph.2016.11.012.
- Osuolale O, Okoh A. (2015b). Incidence of human adenoviruses and Hepatitis A virus in the final effluent of selected wastewater treatment plants in Eastern Cape Province, South Africa. *Viol J* **12**: 98.
- Phokela PT, Ateba CN, Kawadza DT. (2011). Assessing antibiotic resistance profiles in *Escherichia coli* and *Salmonella* species from groundwater in the Mafikeng area, South Africa. *African J Microbiol Res* **5**: 5902–5909.

Pillay L, Olaniran AO. (2016). Assessment of physicochemical parameters and prevalence of virulent and multiple-antibiotic-resistant *Escherichia coli* in treated effluent of two wastewater treatment plants and receiving aquatic milieu in Durban, South Africa. *Environ Monit Assess* **188**. e-pub ahead of print, doi: 10.1007/s10661-016-5232-4.

Samie A, Obi C, Dillingham R. (2007). Enteroaggregative *Escherichia coli* in Venda, South Africa: Distribution of Virulence-Related Genes by Multiplex Polymerase Chain Reaction in Stool Samples of. *Am J Trop Med Hyg* **77**: 142–150.

Sans SANS. (2011). Drinking water - Part 1: Microbiological, physical, chemical, aesthetic and chemical determinands.

Shariff ARVA, Shenoy SM, Yadav T, Radhakrishna M. (2013). The antibiotic susceptibility patterns of uropathogenic *Escherichia coli*, with special reference to the fluoroquinolones. *J Clin Diagn Res* **7**: 1027–30.

Siziwe Koba. (2013). Assessment of the incidence of *E. coli* in Tyume and Buffalo rivers in the Eastern Cape Province of South Africa By Siziwe Koba A thesis submitted in fulfilment of the requirements for the award of a degree of Doctor of Philosophy ( PhD ) ( Microbiology ). University of Fort Hare.

Trang DT, Hien BTT, Mølbak K, Cam PD, Dalsgaard A. (2007). Epidemiology and aetiology of diarrhoeal diseases in adults engaged in wastewater-fed agriculture and aquaculture in Hanoi, Vietnam. *Trop Med Int Heal* **12**: 23–33.

Verma T, Ramteke PW, Garg SK. (2008). Quality assessment of treated tannery wastewater with special emphasis on pathogenic *E. coli* detection through serotyping. *Environ Monit Assess* **145**: 243–249.

Vidal M, Kruger E, Durán C, Lagos R, Levine M, Prado V, *et al.* (2005). Single multiplex PCR assay to identify simultaneously the six categories of diarrheagenic *Escherichia coli* associated with enteric infections. *J Clin Microbiol* **43**. e-pub ahead of print, doi: 10.1128/JCM.43.10.5362.

Watt S, Lanotte P. (2003). *Escherichia coli* strains from pregnant women and neonates: intraspecies genetic distribution and prevalence of virulence factors. *J Clin Microbiol* **41**. e-pub ahead of print, doi: 10.1128/JCM.41.5.1929.

West D, Mangiameli P. (2000). Identifying process conditions in an urban wastewater treatment plant. *Int J Oper Prod Manag* **20**: 573–590.
